# Supplementary material
Source: Royal Society of Chemistry journal article supplement (doi:10.1039/d6ta01789d)
Supplement: d6ta01789d1.pdf [file d6ta01789d1.pdf]

## Supplementary Information

### **Biomimetic Silicon Nitride Skeleton with Oriented Microstructures in Epoxy**

#### **Resin for High Thermal Conductivity and Low Thermal Expansion**

Xu Hao<sup>1</sup>, Song-song Xu<sup>1</sup>, Xiao-Nan Zhou<sup>1</sup>, Jia-Xin Li<sup>1</sup>, Han Jia<sup>1</sup>, Zhi-Lei Wei<sup>1</sup>, Qiang Zhi<sup>2</sup>, Jian-

Feng Yang<sup>1</sup>, Bo Wang<sup>1\*</sup>, Kozo Ishizaki<sup>3</sup>

<sup>1</sup>State Key Laboratory of Porous Metal Materials, Xi'an Jiaotong University, Xi'an, 710049,

China

<sup>2</sup>School of Materials Engineering, Xihang University, Xi'an, 710077, China

<sup>3</sup>Department of Mechanical Engineering, Nagaoka University of Technology, Nagaoka, 940-

2188, Japan

\*Corresponding author. E-mail: [wangbo\\_1@mail.xjtu.edu.cn](mailto:wangbo_1@mail.xjtu.edu.cn) (B. Wang)

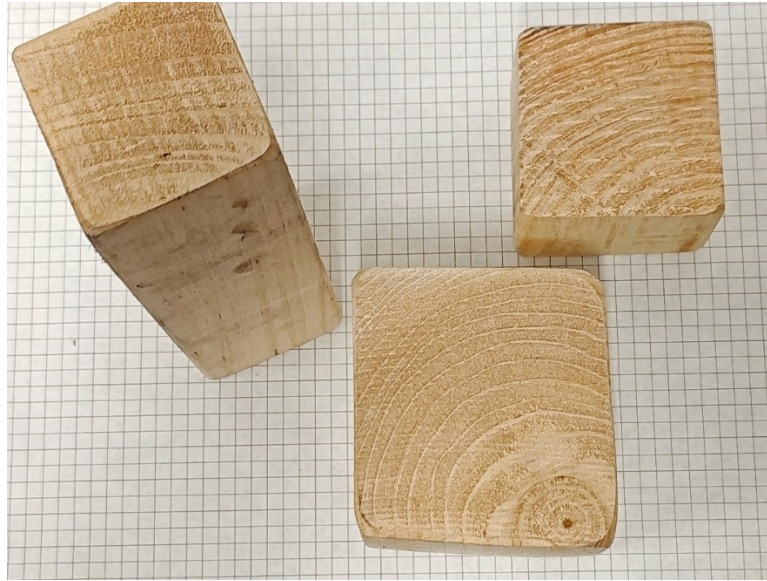

**Fig. S1** Digital photos of spruce

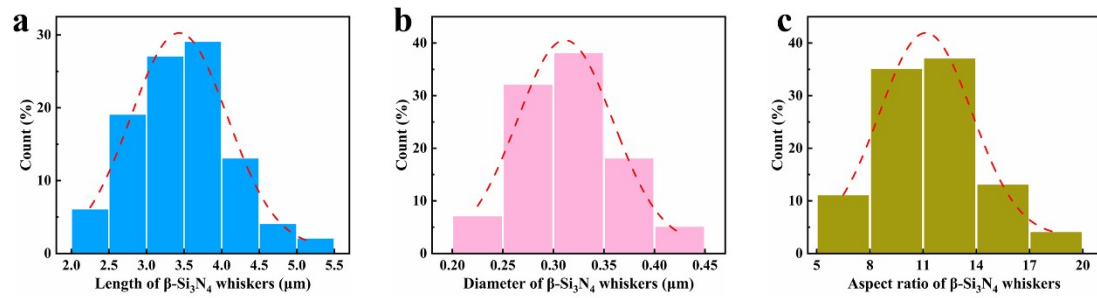

**Fig. S2** (a) Length; (b) diameter and (c) aspect ratio of  $\beta$ -Si<sub>3</sub>N<sub>4</sub> whisker measured from SEM images.

**Table S1. Comparison of thermal conductivity data with other representative polymer composites form the literature.**

| Sample                                 | Filler content<br>(Vol.%) | TC ( $\text{W}\cdot\text{m}^{-1}\cdot\text{K}^{-1}$ ) | Ref       |
|----------------------------------------|---------------------------|-------------------------------------------------------|-----------|
| BN-SiC/EP                              | 40                        | 5.77                                                  | [1]       |
| 40-SiC/EP                              | 40                        | 3.15                                                  | [2]       |
| SiC/EP                                 | 40                        | 1.87                                                  |           |
| 28-SiC/EP                              | 28                        | 1.23                                                  | [3]       |
| 36-Al <sub>2</sub> O <sub>3</sub> /EP  | 36                        | 3.17                                                  | [4]       |
| 43-Al <sub>2</sub> O <sub>3</sub> /EP  | 43                        | 4.36                                                  | [5]       |
| Al <sub>2</sub> O <sub>3</sub> /EP     | 25                        | 6.71                                                  | [6]       |
| 25-Al <sub>2</sub> O <sub>3</sub> /EP  | 25                        | 3.01                                                  |           |
| AlN-Fe <sub>3</sub> O <sub>4</sub> /EP | 41                        | 3.14                                                  | [7]       |
| 45-Si <sub>3</sub> N <sub>4</sub> /EP  | 45                        | 1.75                                                  | [8]       |
| 35-Si <sub>3</sub> N <sub>4</sub> /EP  | 35                        | 1.55                                                  |           |
| 40-Si <sub>3</sub> N <sub>4</sub> /EP  | 40                        | 1.4                                                   | [9]       |
| 23-Si <sub>3</sub> N <sub>4</sub> /EP  | 23                        | 3.8                                                   |           |
| 16-Si <sub>3</sub> N <sub>4</sub> /EP  | 16                        | 1.8                                                   |           |
| 22-Si <sub>3</sub> N <sub>4</sub> /EP  | 22                        | 3.89                                                  | [10]      |
| 15-BNNs/EP                             | 15                        | 5.19                                                  |           |
| 9-BNNs/EP                              | 9                         | 2.85                                                  | [11]      |
| 13-BNNs/EP                             | 13                        | 5.05                                                  | [12]      |
| 10-BNNs/EP                             | 10                        | 3.13                                                  | [13]      |
| 4-BNNs/EP                              | 4                         | 1.56                                                  |           |
| G/MLG/EP                               | 10                        | 5.1                                                   | [14]      |
| GNP/EP                                 | 25                        | 6.44                                                  | [15]      |
| Al particle/EP                         | 48                        | 1.47                                                  | [16]      |
| AgNW/EP                                | 4                         | 0.9                                                   | [17]      |
| Bio-Si <sub>3</sub> N <sub>4</sub> /EP | 38                        | 8.26                                                  | This work |

**Table S2. Material properties used in the finite element simulations.**

| <b>Properties</b>                                             | <b>Si<sub>3</sub>N<sub>4</sub></b>          | <b>EP</b>               |
|---------------------------------------------------------------|---------------------------------------------|-------------------------|
| Thermal conductivity<br>(W·m <sup>-1</sup> ·K <sup>-1</sup> ) |                                             | 0.18                    |
| Density (g·cm <sup>-3</sup> )                                 |                                             | 1.8                     |
| Heat capacity (J·kg <sup>-1</sup> ·K <sup>-1</sup> )          | COMSOL Multiphysics<br>Material Library     | 1.4                     |
| Young's modulus (GPa)                                         | (β-Si <sub>3</sub> N <sub>4</sub> , c-axis) | 2.5                     |
| Poisson's ratio                                               |                                             | 0.38                    |
| Coefficient of thermal<br>expansion (K <sup>-1</sup> )        |                                             | 74.3 × 10 <sup>-6</sup> |

**Table S3. The average displacement of each surface of the models.**

| Model          | Direction | Surface | Displacement<br>( $\mu\text{m}$ ) | Size<br>( $\mu\text{m}$ ) | Linear expansivity<br>(%) |
|----------------|-----------|---------|-----------------------------------|---------------------------|---------------------------|
| A single unit  | x         | left    | -0.0016098                        | 22.0                      | 0.01465                   |
|                |           | right   | 0.0016138                         |                           |                           |
|                | y         | front   | -0.00090103                       | 17.0                      | 0.01062                   |
|                |           | back    | 0.00090383                        |                           |                           |
|                | z         | bottom  | -0.0010804                        | 19.5                      | 0.01106                   |
|                |           | top     | 0.0010758                         |                           |                           |
| Multiple units | x         | left    | -0.015915                         | 200                       | 0.01434                   |
|                |           | right   | 0.015919                          |                           |                           |
|                | y         | front   | -0.0095787                        | 200                       | 0.00861                   |
|                |           | back    | 0.0095788                         |                           |                           |
|                | z         | bottom  | -0.018078                         | 200                       | 0.01629                   |
|                |           | top     | 0.01808                           |                           |                           |

## References

1. K. Kim, H. Ju and J. Kim, *Compos. Sci. Technol.*, 2016, 123, 99–105.
2. K. Kim, M. Kim, J. Kim and J. Kim, *Ceram. Int.*, 2015, 41, 12280–12287.
3. A.-j. Ma, H. Li, W. Chen and Y. Hou, *Polym.-Plast. Technol. Eng.*, 2013, 52, 295–299.
4. Y. Hu, G. Du and N. Chen, *Compos. Sci. Technol.*, 2016, 124, 36–43.
5. L.-C. Hao, Z.-X. Li, F. Sun, K. Ding, X.-N. Zhou, Z.-X. Song, Z.-Q. Shi, J.-F. Yang and B. Wang, *Compos. Part A Appl. Sci. Manuf.*, 2019, 127, 105648.
6. G. Pan, Y. Yao, X. Zeng, J. Sun, J. Hu, R. Sun, J.-B. Xu and C.-P. Wong, *ACS Appl. Mater. Interfaces*, 2017, 9, 33001–33010.
7. K. Kim and J. Kim, *Compos. Part B Eng.*, 2016, 93, 67–74.
8. H. He, R. Fu, Y. Han, Y. Shen and X. Song, *J. Mater. Sci.*, 2007, 42, 6749–6754.
9. L. Yin, X. Zhou, J. Yu, H. Wang and C. Ran, *Compos. Part A Appl. Sci. Manuf.*, 2016, 90, 626–632.
10. Z. Tian, J. Sun, S. Wang, X. Zeng, S. Zhou, S. Bai, N. Zhao and C.-P. Wong, *J. Mater. Chem. A*, 2018, 6, 17540–17547.
11. X. Zeng, Y. Yao, Z. Gong, F. Wang, R. Sun, J. Xu and C.-P. Wong, *Small*, 2015, 11, 6205–6213.
12. J. Hu, Y. Huang, Y. Yao, G. Pan, J. Sun, X. Zeng, R. Sun, J.-B. Xu, B. Song and C.-P. Wong, *ACS Appl. Mater. Interfaces*, 2017, 9, 13544–13553.
13. J. Chen, X. Huang, Y. Zhu and P. Jiang, *Adv. Funct. Mater.*, 2016, 27, 1604754.
14. K. M. F. Shahil and A. A. Balandin, *Nano Lett.*, 2012, 12, 861–867.
15. A. Yu, P. Ramesh, M. E. Itkis, E. Bekyarova and R. C. Haddon, *J. Phys. Chem. C*, 2007, 111, 7565–7569.
16. W. Zhou and D. Yu, *J. Appl. Polym. Sci.*, 2010, 118, 3156–3166.
17. Y. Feng, X. Li, X. Zhao, Y. Ye, X. Zhou, H. Liu, C. Liu and X. Xie, *ACS Appl. Mater. Interfaces*, 2018, 10, 21628–21641.
